# Supplementary material for: Theoretical study on the H-atom abstraction reactions of pentanol + HȮ2, part I: five branched pentanol isomers
Source: Royal Society of Chemistry journal article supplement (doi:10.1039/d4cp01923g), 2024-01-01
Supplement: d4cp01923g1.pdf [file d4cp01923g1.pdf]

## *Supplementary Material*

### **Theoretical Study on the H-atom Abstraction Reactions of Pentanol + HO<sub>2</sub>, Part I : Five Branched Pentanol Isomers**

Jin-Tao Chen<sup>a,b</sup>, Yueying Liang<sup>c</sup>, Haoyuan Lang<sup>a</sup>, Xingcai Lu<sup>c</sup>, Lijun Yang<sup>d</sup>, Chong-

Wen Zhou<sup>\*a,b</sup>

<sup>a</sup> *School of Energy and Power Engineering, Beihang University, Beijing 100191, PR*

*China*

<sup>b</sup> *Combustion Chemistry Centre, School of Biological and Chemical Sciences, MaREI, Ryan*

*Institute, University of Galway, Galway, Ireland*

<sup>c</sup> *Key Laboratory for Power Machinery and Engineering of M. O. E., Shanghai Jiao Tong*

*University, Shanghai 200240, PR China*

<sup>d</sup> *School of Astronautics, Beihang University, Beijing 100191, PR China*

E-mail address: [chongwen.zhou@universityofgalway.ie](mailto:chongwen.zhou@universityofgalway.ie) (C.-W. Zhou)

#### **Contents**

**Section 1:** T1 diagnostic values for reactants, transition states, and products calculated in this work.

**Section 2:** Species and structures of some reactants and products identified calculated in this work.

**Table S1****T1 diagnostic values for reactants, transition states, and products calculated in this work.**

| Species                                                                          | T1    | Species                                                                         | T1    |
|----------------------------------------------------------------------------------|-------|---------------------------------------------------------------------------------|-------|
| $\text{H}\dot{\text{O}}_2$                                                       | 0.038 | $\text{H}_2\text{O}_2$                                                          | 0.010 |
| 2-Methyl-1-butanol+ $\text{H}\dot{\text{O}}_2$ radical                           |       | 1,2-Dimethyl-1-propanol+ $\text{H}\dot{\text{O}}_2$ radical                     |       |
| $\text{CH}_3\text{CH}_2\text{CH}(\text{CH}_3)\text{CH}_2\text{OH}$               | 0.009 | $\text{CH}_3\text{CH}(\text{CH}_3)\text{CH}(\text{CH}_3)\text{OH}$              | 0.009 |
| TS- $\delta_p$                                                                   | 0.022 | TS- $\gamma_p$                                                                  | 0.022 |
| $\dot{\text{C}}\text{H}_2\text{CH}_2\text{CH}(\text{CH}_3)\text{CH}_2\text{OH}$  | 0.010 | $\dot{\text{C}}\text{H}_2\text{CH}(\text{CH}_3)\text{CH}(\text{CH}_3)\text{OH}$ | 0.010 |
| TS- $\gamma_s$                                                                   | 0.019 | TS- $\beta_t$                                                                   | 0.017 |
| $\text{CH}_3\dot{\text{C}}\text{HCH}(\text{CH}_3)\text{CH}_2\text{OH}$           | 0.011 | $\text{CH}_3\dot{\text{C}}(\text{CH}_3)\text{CH}(\text{CH}_3)\text{OH}$         | 0.011 |
| TS- $\beta_t$                                                                    | 0.017 | TS- $\alpha_t$                                                                  | 0.019 |
| $\text{CH}_3\text{CH}_2\dot{\text{C}}(\text{CH}_3)\text{CH}_2\text{OH}$          | 0.012 | $\text{CH}_3\text{CH}(\text{CH}_3)\dot{\text{C}}(\text{CH}_3)\text{OH}$         | 0.014 |
| TS- $\gamma_p$                                                                   | 0.022 | TS- $\beta_p$                                                                   | 0.022 |
| $\text{CH}_3\text{CH}_2\text{CH}(\dot{\text{C}}\text{H}_2)\text{CH}_2\text{OH}$  | 0.010 | $\text{CH}_3\text{CH}(\text{CH}_3)\text{CH}(\dot{\text{C}}\text{H}_2)\text{OH}$ | 0.011 |
| TS- $\alpha_s$                                                                   | 0.017 | TS-OH                                                                           | 0.072 |
| $\text{CH}_3\text{CH}_2\text{CH}(\text{CH}_3)\dot{\text{C}}\text{HOH}$           | 0.014 | $\text{CH}_3\text{CH}(\text{CH}_3)\text{CH}(\text{CH}_3)\dot{\text{O}}$         | 0.017 |
| TS-OH                                                                            | 0.073 | 3-Methyl-1-butanol + $\text{H}\dot{\text{O}}_2$ radical                         |       |
| $\text{CH}_3\text{CH}_2\text{CH}(\text{CH}_3)\text{CH}_2\dot{\text{O}}$          | 0.016 | $\text{CH}_3\text{CH}(\text{CH}_3)\text{CH}_2\text{CH}_2\text{OH}$              | 0.009 |
| 1,1-Dimethyl-1-propanol+ $\text{H}\dot{\text{O}}_2$ radical                      |       | TS- $\delta_p$                                                                  | 0.022 |
| $\text{CH}_3\text{CH}_2\text{C}(\text{CH}_2)(\text{CH}_3)\text{OH}$              | 0.009 | $\text{CH}_3\text{CH}(\dot{\text{C}}\text{H}_2)\text{CH}_2\text{CH}_2\text{OH}$ | 0.010 |
| TS- $\gamma_p$                                                                   | 0.022 | TS- $\gamma_t$                                                                  | 0.015 |
| $\dot{\text{C}}\text{H}_2\text{CH}_2\text{C}(\text{CH}_3)_2\text{OH}$            | 0.010 | $\text{CH}_3\dot{\text{C}}(\text{CH}_3)\text{CH}_2\text{CH}_2\text{OH}$         | 0.012 |
| TS- $\beta_s$                                                                    | 0.020 | TS- $\beta_s$                                                                   | 0.020 |
| $\text{CH}_3\dot{\text{C}}\text{HC}(\text{CH}_3)_2\text{OH}$                     | 0.011 | $\text{CH}_3\text{CH}(\text{CH}_3)\dot{\text{C}}\text{HCH}_2\text{OH}$          | 0.011 |
| TS- $\beta_p$                                                                    | 0.021 | TS- $\alpha_s$                                                                  | 0.018 |
| $\text{CH}_3\text{CH}_2\text{C}(\dot{\text{C}}\text{H}_2)(\text{CH}_3)\text{OH}$ | 0.011 | $\text{CH}_3\text{CH}(\text{CH}_3)\text{CH}_2\dot{\text{C}}\text{HOH}$          | 0.014 |
| TS-OH                                                                            | 0.076 | TS-OH                                                                           | 0.145 |
| $\text{CH}_3\text{CH}_2\text{C}(\text{CH}_3)_2\dot{\text{O}}$                    | 0.016 | $\text{CH}_3\text{CH}(\text{CH}_3)\text{CH}_2\text{CH}_2\dot{\text{O}}$         | 0.016 |
| 2,2-Dimethyl-1-propanol+ $\text{H}\dot{\text{O}}_2$ radical                      |       |                                                                                 |       |
| $\text{CH}_3\text{C}(\text{CH}_3)_2\text{CH}_2\text{OH}$                         | 0.009 |                                                                                 |       |
| TS- $\gamma_p$                                                                   | 0.022 |                                                                                 |       |
| $\dot{\text{C}}\text{H}_2\text{C}(\text{CH}_3)_2\text{CH}_2\text{OH}$            | 0.011 |                                                                                 |       |
| TS- $\alpha_s$                                                                   | 0.017 |                                                                                 |       |
| $\text{CH}_3\text{C}(\text{CH}_3)_2\dot{\text{C}}\text{HOH}$                     | 0.014 |                                                                                 |       |
| TS-OH                                                                            | 0.064 |                                                                                 |       |
| $\text{CH}_3\text{C}(\text{CH}_3)_2\text{CH}_2\dot{\text{O}}$                    | 0.016 |                                                                                 |       |

**Table S2**

**Species and structures of some reactants and products identified calculated in this work.**

| Species                                                                         | Molecular structure                                                                  |
|---------------------------------------------------------------------------------|--------------------------------------------------------------------------------------|
| $\text{CH}_3\text{CH}_2\text{CH}(\text{CH}_3)\text{CH}_2\text{OH}$              | 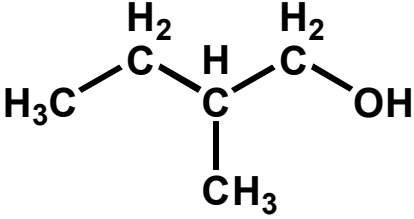   |
| $\text{CH}_3\text{CH}_2\text{CH}(\text{CH}_3)\text{CH}_2\dot{\text{O}}$         |    |
| $\text{CH}_3\text{CH}_2\text{CH}(\text{CH}_3)\dot{\text{C}}\text{HOH}$          |   |
| $\text{CH}_3\text{CH}_2\dot{\text{C}}(\text{CH}_3)\text{CH}_2\text{OH}$         |  |
| $\text{CH}_3\text{CH}_2\text{CH}(\dot{\text{C}}\text{H}_2)\text{CH}_2\text{OH}$ |  |
| $\text{CH}_3\dot{\text{C}}\text{HCH}(\text{CH}_3)\text{CH}_2\text{OH}$          |  |

|                                                                                  |  |
|----------------------------------------------------------------------------------|--|
| $\dot{\text{C}}\text{H}_2\text{CH}_2\text{CH}(\text{CH}_3)\text{CH}_2\text{OH}$  |  |
| $\text{CH}_3\text{CH}_2\text{C}(\text{CH}_3)_2\text{OH}$                         |  |
| $\text{CH}_3\text{CH}_2\text{C}(\text{CH}_3)_2\dot{\text{O}}$                    |  |
| $\text{CH}_3\text{CH}_2\text{C}(\dot{\text{C}}\text{H}_2)(\text{CH}_3)\text{OH}$ |  |
| $\text{CH}_3\dot{\text{C}}\text{H}\text{C}(\text{CH}_3)_2\text{OH}$              |  |
| $\dot{\text{C}}\text{H}_2\text{CH}_2\text{C}(\text{CH}_3)_2\text{OH}$            |  |
| $\text{CH}_3\text{CH}(\text{CH}_3)\text{CH}(\text{CH}_3)\text{OH}$               |  |

|                                                                                 |                                                                                                                                                                                                                                                                                                                                                                                                                                                                                       |
|---------------------------------------------------------------------------------|---------------------------------------------------------------------------------------------------------------------------------------------------------------------------------------------------------------------------------------------------------------------------------------------------------------------------------------------------------------------------------------------------------------------------------------------------------------------------------------|
| $\text{CH}_3\text{CH}(\text{CH}_3)\text{CH}(\text{CH}_3)\dot{\text{O}}$         | 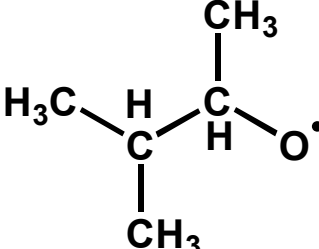 <p>Structural formula showing a central carbon atom bonded to three methyl groups (CH<sub>3</sub>) and a hydrogen atom (H). This central carbon is bonded to another carbon atom, which is bonded to two methyl groups (CH<sub>3</sub>) and a hydrogen atom (H). The second carbon atom is bonded to an oxygen atom (O) with a radical dot (·).</p>                                                |
| $\text{CH}_3\text{CH}(\text{CH}_3)\dot{\text{C}}(\text{CH}_3)\text{OH}$         |  <p>Structural formula showing a central carbon atom bonded to three methyl groups (CH<sub>3</sub>) and a hydrogen atom (H). This central carbon is bonded to another carbon atom, which is bonded to one methyl group (CH<sub>3</sub>) and a hydroxyl group (OH). The second carbon atom has a radical dot (·) on its central carbon.</p>                                                          |
| $\text{CH}_3\text{CH}(\text{CH}_3)\text{CH}(\dot{\text{C}}\text{H}_2)\text{OH}$ |  <p>Structural formula showing a central carbon atom bonded to three methyl groups (CH<sub>3</sub>) and a hydrogen atom (H). This central carbon is bonded to another carbon atom, which is bonded to one methyl group (CH<sub>3</sub>) and a hydroxyl group (OH). The second carbon atom has a radical dot (·) on its CH<sub>2</sub> group.</p>                                                   |
| $\text{CH}_3\dot{\text{C}}(\text{CH}_3)\text{CH}(\text{CH}_3)\text{OH}$         |  <p>Structural formula showing a central carbon atom bonded to three methyl groups (CH<sub>3</sub>) and a hydrogen atom (H). This central carbon has a radical dot (·) on its central carbon. It is bonded to another carbon atom, which is bonded to one methyl group (CH<sub>3</sub>) and a hydroxyl group (OH).</p>                                                                            |
| $\dot{\text{C}}\text{H}_2\text{CH}(\text{CH}_3)\text{CH}(\text{CH}_3)\text{OH}$ |  <p>Structural formula showing a central carbon atom bonded to three methyl groups (CH<sub>3</sub>) and a hydrogen atom (H). This central carbon is bonded to another carbon atom, which is bonded to one methyl group (CH<sub>3</sub>) and a hydroxyl group (OH). The second carbon atom has a radical dot (·) on its CH<sub>2</sub> group.</p>                                                  |
| $\text{CH}_3\text{CH}(\text{CH}_3)\text{CH}_2\text{CH}_2\text{OH}$              |  <p>Structural formula showing a four-carbon chain. The first carbon is bonded to three methyl groups (CH<sub>3</sub>) and a hydrogen atom (H). The second carbon is bonded to one methyl group (CH<sub>3</sub>) and a hydrogen atom (H). The third carbon is bonded to two hydrogen atoms (H<sub>2</sub>). The fourth carbon is bonded to one hydrogen atom (H) and one hydroxyl group (OH).</p> |

|                                                                                 |  |
|---------------------------------------------------------------------------------|--|
| $\text{CH}_3\text{CH}(\text{CH}_3)\text{CH}_2\text{CH}_2\dot{\text{O}}$         |  |
| $\text{CH}_3\text{CH}(\text{CH}_3)\text{CH}_2\dot{\text{C}}\text{HOH}$          |  |
| $\text{CH}_3\text{CH}(\text{CH}_3)\dot{\text{C}}\text{HCH}_2\text{OH}$          |  |
| $\text{CH}_3\dot{\text{C}}(\text{CH}_3)\text{CH}_2\text{CH}_2\text{OH}$         |  |
| $\text{CH}_3\text{CH}(\dot{\text{C}}\text{H}_2)\text{CH}_2\text{CH}_2\text{OH}$ |  |
| $\text{CH}_3\text{C}(\text{CH}_3)_2\text{CH}_2\text{OH}$                        |  |
| $\text{CH}_3\text{C}(\text{CH}_3)_2\text{CH}_2\dot{\text{O}}$                   |  |

|                                                                       |                                                                                                                                                                                                                                                                                                                                                                                        |
|-----------------------------------------------------------------------|----------------------------------------------------------------------------------------------------------------------------------------------------------------------------------------------------------------------------------------------------------------------------------------------------------------------------------------------------------------------------------------|
| $\text{CH}_3\text{C}(\text{CH}_3)_2\dot{\text{C}}\text{HOH}$          | 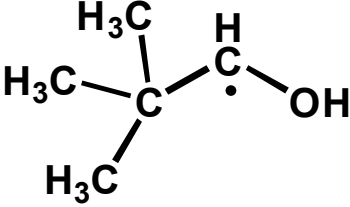 <p>The diagram shows a central carbon atom bonded to three methyl groups (H<sub>3</sub>C) and a CH<sub>2</sub>OH group. The radical dot is located on the carbon atom of the CH<sub>2</sub>OH group.</p>                                                                                            |
| $\dot{\text{C}}\text{H}_2\text{C}(\text{CH}_3)_2\text{CH}_2\text{OH}$ |  <p>The diagram shows a central carbon atom bonded to two methyl groups (H<sub>3</sub>C) and two CH<sub>2</sub> groups. One of the CH<sub>2</sub> groups is bonded to an OH group. The radical dot is located on the carbon atom of the CH<sub>2</sub> group that is not bonded to the OH group.</p> |
